# Supplementary material for: In Vitro Anti-Inflammatory Activity of Methyl Derivatives of Flavanone
Source: MDPI journal article supplement (doi:10.3390/molecules28237837), 2023-11-29
Supplement: s1 [file s1]

# In Vitro Anti-Inflammatory Activity of Methyl Derivatives of Flavanone

Małgorzata Klósek <sup>1,\*</sup>, Agnieszka Krawczyk-Łebek <sup>2</sup>, Edyta Kostrzewa-Susłow <sup>2</sup>, Ewelina Szliszka <sup>1</sup>, Joanna Bronikowska <sup>1</sup>, Dagmara Jaworska <sup>1</sup>, Grażyna Pietsz <sup>1</sup> and Zenon P. Czuba <sup>1</sup>

<sup>1</sup> Department of Microbiology and Immunology, Faculty of Medical Sciences, Medical University of Silesia in Katowice, Jordana 19, 41-808 Zabrze, Poland; eszliszka@sum.edu.pl (E.S.); jbronikowska@sum.edu.pl (J.B.); djaworska@sum.edu.pl (D.J.); gpietsz@sum.edu.pl (G.P.); zczuba@sum.edu.pl (Z.P.C.)

<sup>2</sup> Department of Food Chemistry and Biocatalysis, Wrocław University of Environmental and Life Sciences, Norwida 25, 50-375 Wrocław, Poland; agnieszka.krawczyk-lebek@upwr.edu.pl (A.K.-Ł.); edyta.kostrzewa-suslow@upwr.edu.pl (E.K.-S.)

\* Correspondence: mklosek@sum.edu.pl; Tel./Fax: +48-322-722-554

**Citation:** Klósek, M.; Krawczyk-Łebek, A.; Kostrzewa-Susłow, E.; Szliszka, E.; Bronikowska, J.; Jaworska, D.; Pietsz, G.; Czuba, Z.P. In Vitro Anti-Inflammatory Activity of Methyl Derivatives of Flavanone. *Molecules* **2023**, *28*, 7837. <https://doi.org/10.3390/molecules28237837>

Academic Editors: Athina Geronikaki and H. P. Vasanth Rupasinghe

Received: 18 September 2023  
Revised: 26 November 2023  
Accepted: 27 November 2023  
Published: 29 November 2023

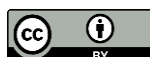

**Copyright:** © 2023 by the authors. Submitted for possible open access publication under the terms and conditions of the Creative Commons Attribution (CC BY) license (<https://creativecommons.org/licenses/by/4.0/>).

## Content

**Figure S1.** MS analysis of 2'-hydroxy-3-methylchalcone (**6A**)

**Figure S2.** <sup>1</sup>H NMR spectrum (δ, acetone-d<sub>6</sub>, 600 MHz) of 2'-hydroxy-3-methylchalcone (**6A**)

**Figure S3.** <sup>1</sup>H NMR spectrum expansion (δ, acetone-d<sub>6</sub>, 600 MHz) of 2'-hydroxy-3-methylchalcone (**6A**)

**Figure S4.** <sup>13</sup>C NMR spectrum (δ, acetone-d<sub>6</sub>, 151 MHz) of 2'-hydroxy-3-methylchalcone (**6A**)

**Figure S5.** <sup>13</sup>C NMR spectrum expansion (δ, acetone-d<sub>6</sub>, 151 MHz) of 2'-hydroxy-3-methylchalcone (**6A**)

**Figure S6.** COSY contour map – <sup>1</sup>H × <sup>1</sup>H of 2'-hydroxy-3-methylchalcone (**6A**)

**Figure S7.** COSY contour map – <sup>1</sup>H × <sup>1</sup>H expansion of 2'-hydroxy-3-methylchalcone (**6A**)

**Figure S8.** HSQC contour map – <sup>1</sup>H × <sup>13</sup>C of 2'-hydroxy-3-methylchalcone (**6A**)

**Figure S9.** HSQC contour map – <sup>1</sup>H × <sup>13</sup>C expansion of 2'-hydroxy-3-methylchalcone (**6A**)

**Figure S10.** HMBC contour map –  $^1\text{H} \times ^{13}\text{C}$  of 2'-hydroxy-3-methylchalcone (**6A**)

**Figure S11.** HMBC contour map –  $^1\text{H} \times ^{13}\text{C}$  expansion of 2'-hydroxy-3-methylchalcone (**6A**)

**Figure S12.** HMBC contour map –  $^1\text{H} \times ^{13}\text{C}$  expansion of 2'-hydroxy-3-methylchalcone (**6A**)

**Figure S13.** MS analysis of 3'-methylflavanone (**6B**)

**Figure S14.**  $^1\text{H}$  NMR spectrum ( $\delta$ , acetone- $d_6$ , 600 MHz) of 3'-methylflavanone (**6B**)

**Figure S15.**  $^1\text{H}$  NMR spectrum expansion ( $\delta$ , acetone- $d_6$ , 600 MHz) of 3'-methylflavanone (**6B**)

**Figure S16.**  $^{13}\text{C}$  NMR spectrum ( $\delta$ , acetone- $d_6$ , 151 MHz) of 3'-methylflavanone (**6B**)

**Figure S17.**  $^{13}\text{C}$  NMR spectrum expansion ( $\delta$ , acetone- $d_6$ , 151 MHz) of 3'-methylflavanone (**6B**)

**Figure S18.** COSY contour map –  $^1\text{H} \times ^1\text{H}$  of 3'-methylflavanone (**6B**)

**Figure S19.** COSY contour map –  $^1\text{H} \times ^1\text{H}$  expansion of 3'-methylflavanone (**6B**)

**Figure S20.** HSQC contour map –  $^1\text{H} \times ^{13}\text{C}$  of 3'-methylflavanone (**6B**)

**Figure S21.** HSQC contour map –  $^1\text{H} \times ^{13}\text{C}$  expansion of 3'-methylflavanone (**6B**)

**Figure S22.** HMBC contour map –  $^1\text{H} \times ^{13}\text{C}$  expansion of 3'-methylflavanone (**6B**)

**Figure S23.** HMBC contour map –  $^1\text{H} \times ^{13}\text{C}$  expansion of 3'-methylflavanone (**6B**)

**Table S1.** The effect of methyl-derivatives of flavanone on the production IL-1 $\beta$  in compared to control in LPS stimulated RAW264.1 cells (n=3). Statistical significance was analysed using Fisher's LSD test. Results marked in red are statistically significant in Fisher's LSD test. Multivariate Tests of Significance ( $F = 7.499$ ,  $p < 0.05$ ).

**Table S2.** The effect of methyl-derivatives of flavanone on the production IL-6 in compared to control in LPS stimulated RAW264.1 cells (n=3). Statistical significance was analysed using Fisher's LSD test. Results marked in red are statistically significant in Fisher's LSD test. Multivariate Tests of Significance ( $F = 7.499$ ,  $p < 0.05$ ).

**Table S3.** The effect of methyl-derivatives of flavanone on the production IL-12p40 in compared to control in LPS stimulated RAW264.1 cells (n=3). Statistical significance was analysed using Fisher's LSD test. Results marked in red are statistically significant in Fisher's LSD test. Multivariate Tests of Significance ( $F = 7.499$ ,  $p < 0.05$ ).

**Table S4.** The effect of methyl-derivatives of flavanone on the production IL-12p70 in compared to control in LPS stimulated RAW264.1 cells (n=3). Statistical significance was analysed using Fisher's LSD test. Results marked in red are statistically significant in Fisher's LSD test. Multivariate Tests of Significance ( $F = 7.499$ ,  $p < 0.05$ ).

**Table S5.** The effect of methyl-derivatives of flavanone on the production TNF- $\alpha$  in compared to control in LPS stimulated RAW264.1 cells (n=3). Statistical significance was analysed using Fisher's LSD test. Results marked in red are statistically significant in Fisher's LSD test. Multivariate Tests of Significance ( $F = 7.499$ ,  $p < 0.05$ ).

**Table S6.** Average, standard deviations, statistical significance of cytotoxic activity of methyl-derivatives of flavanone. Statistical significance was calculated using t-test (Table S3).

**Table S7.** Average, standard deviations, statistical significance of chemiluminescence of methyl-derivatives of flavanone. Statistical significance was calculated using t-test (Table S5).

**Table S8.** The effect of methyl-derivatives of flavanone on the concentration of nitrite in compared to control in LPS stimulated RAW264.1 cells (n=3). Statistical significance was analysed using Fisher's LSD test. Results marked in red are statistically significant in Fisher's LSD test. Multivariate Tests of Significance ( $F = 7.499$ ,  $p < 0$ ).

**Figure S1.** MS analysis of 2'-hydroxy-3-methylchalcone (6A)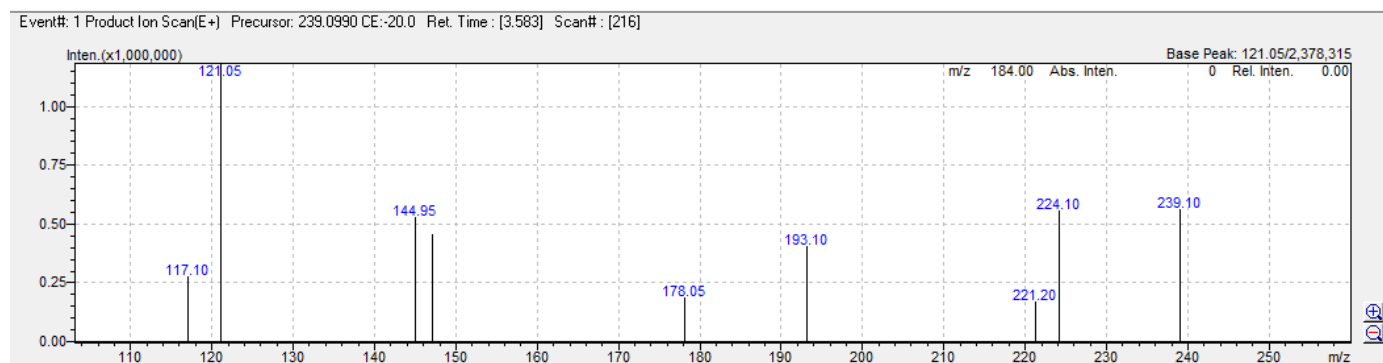**Figure S2.**  $^1\text{H}$  NMR spectrum ( $\delta$ , acetone- $d_6$ , 600 MHz) of 2'-hydroxy-3-methylchalcone (6A)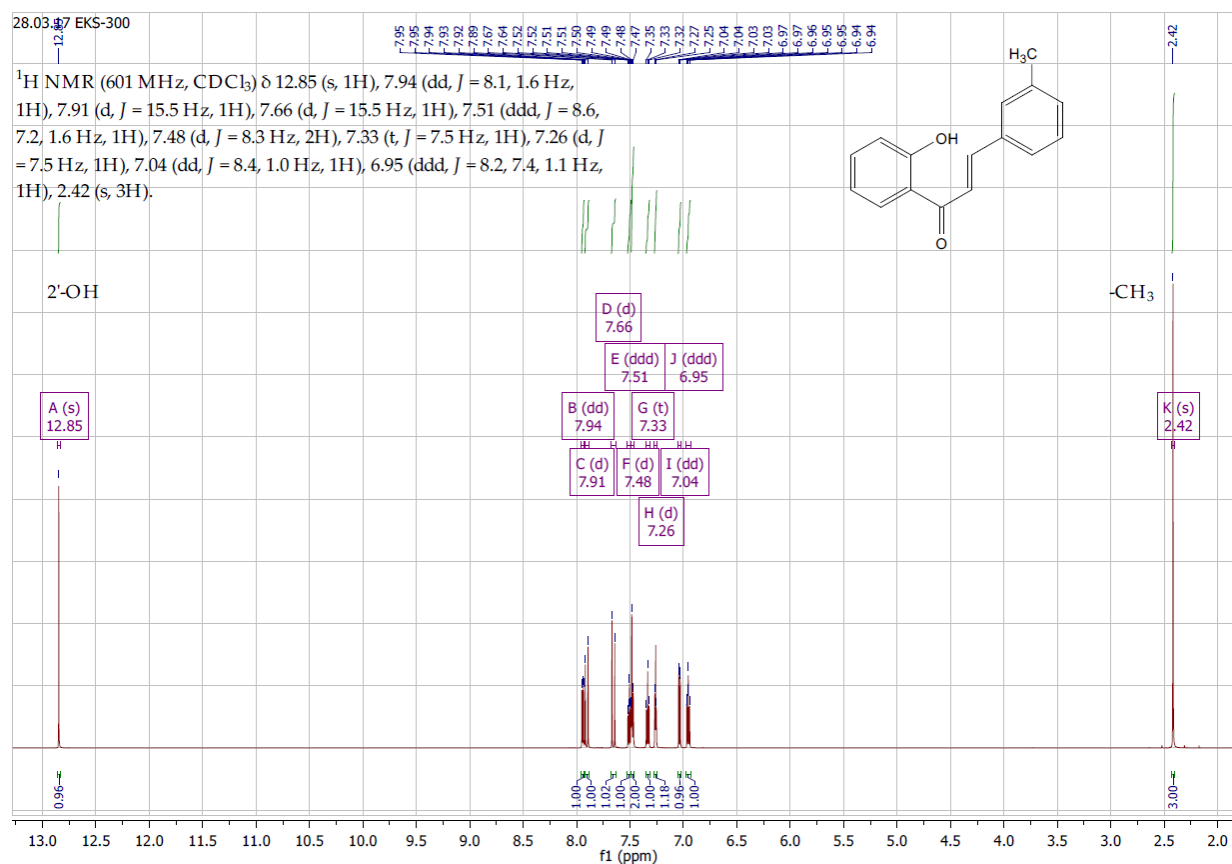

**Figure S3**  $^1\text{H}$  NMR spectrum expansion ( $\delta$ , acetone- $d_6$ , 600 MHz) of 2'-hydroxy-3-methylchalcone (**6A**)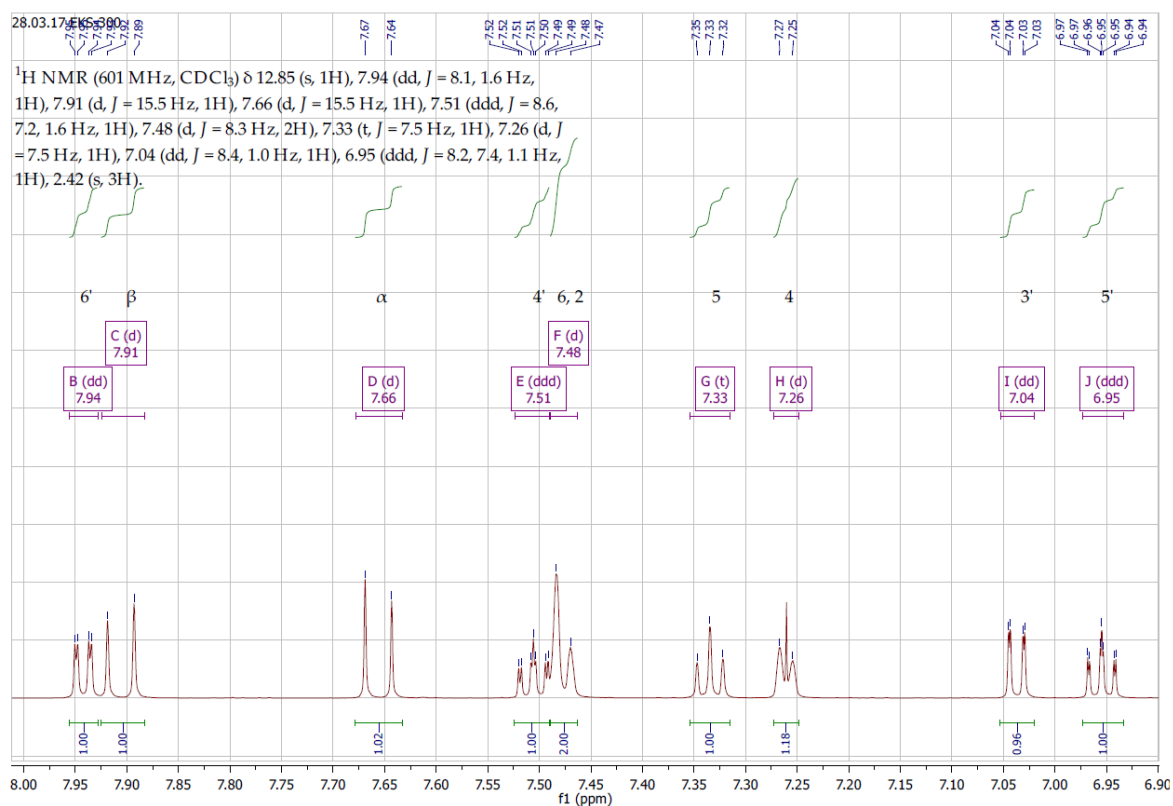**Figure S4.**  $^{13}\text{C}$  NMR spectrum ( $\delta$ , acetone- $d_6$ , 151 MHz) of 2'-hydroxy-3-methylchalcone (**6A**)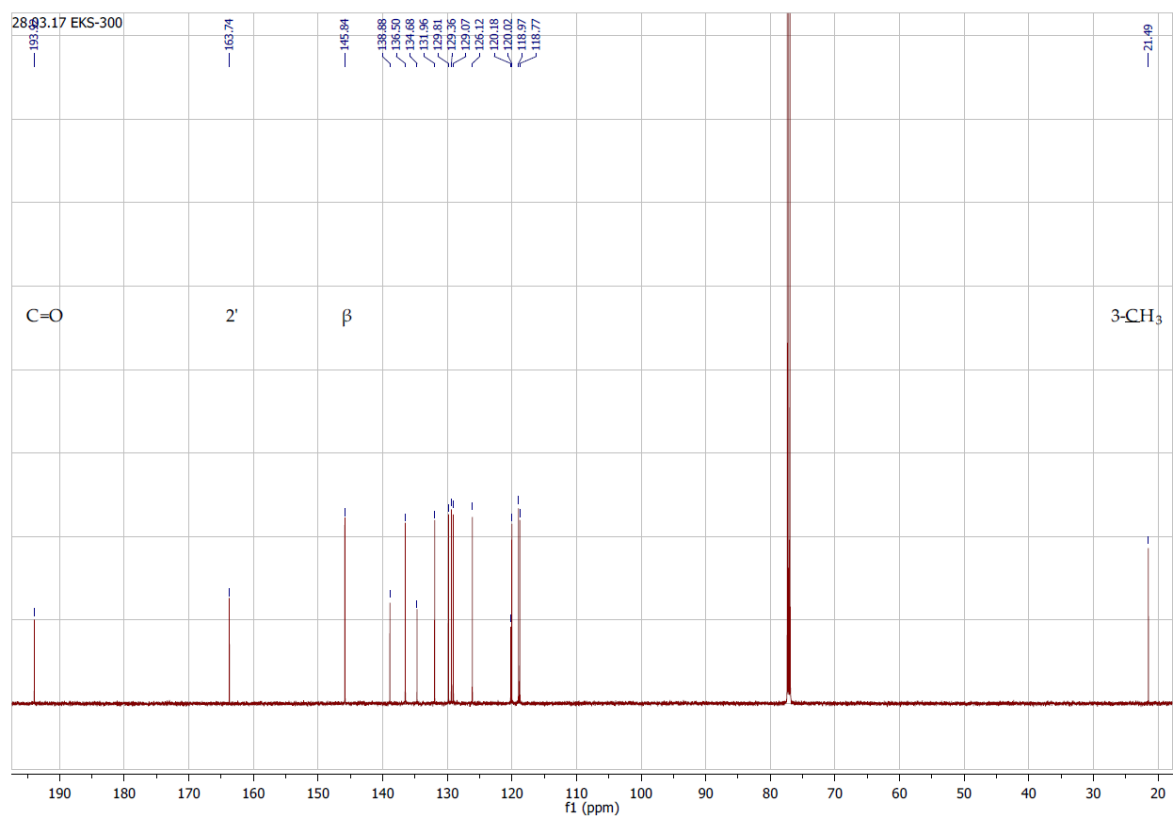

**Figure S5.**  $^{13}\text{C}$  NMR spectrum expansion ( $\delta$ , acetone- $d_6$ , 151 MHz) of 2'-hydroxy-3-methylchalcone (**6A**)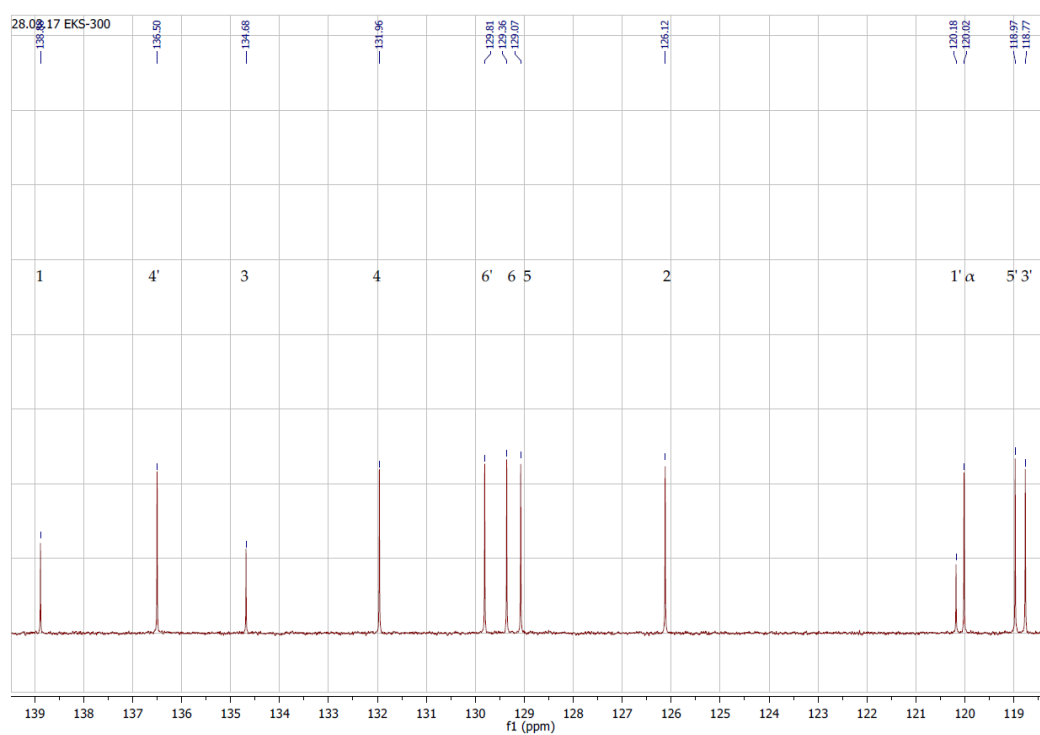**Figure S6.** COSY contour map –  $^1\text{H} \times ^1\text{H}$  of 2'-hydroxy-3-methylchalcone (**6A**)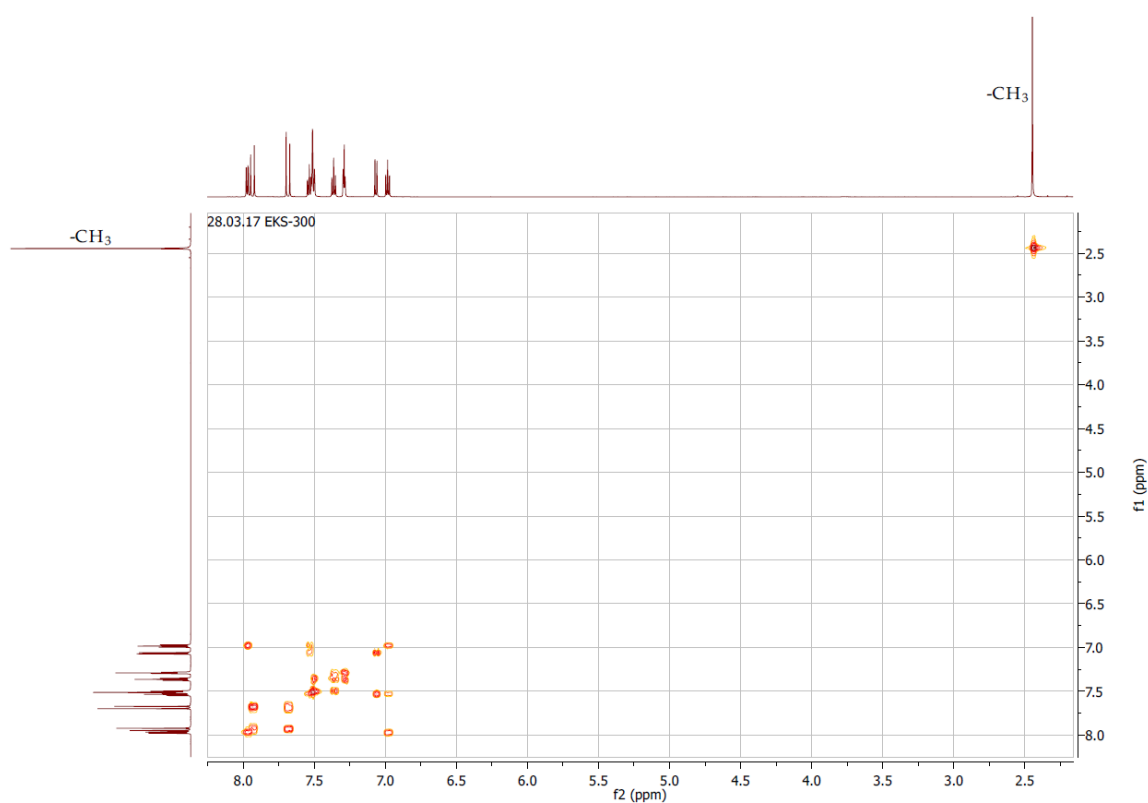

**Figure S7.** COSY contour map –  $^1\text{H} \times ^1\text{H}$  expansion of 2'-hydroxy-3-methylchalcone (6A)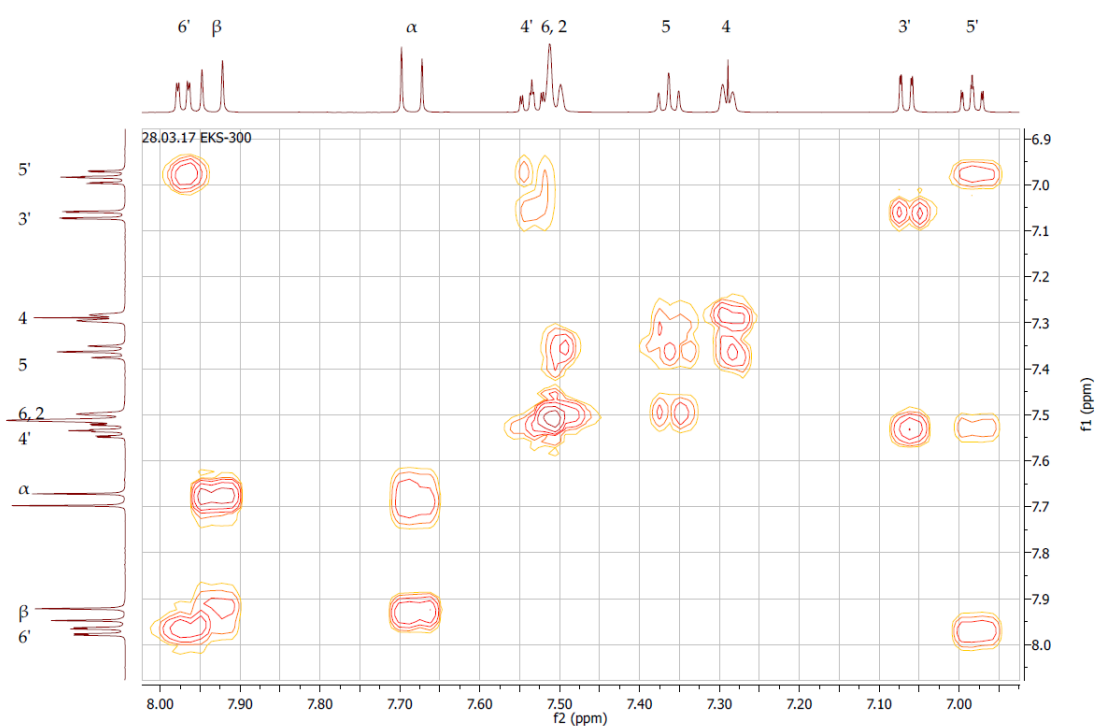**Figure S8.** HSQC contour map –  $^1\text{H} \times ^{13}\text{C}$  of 2'-hydroxy-3-methylchalcone (6A)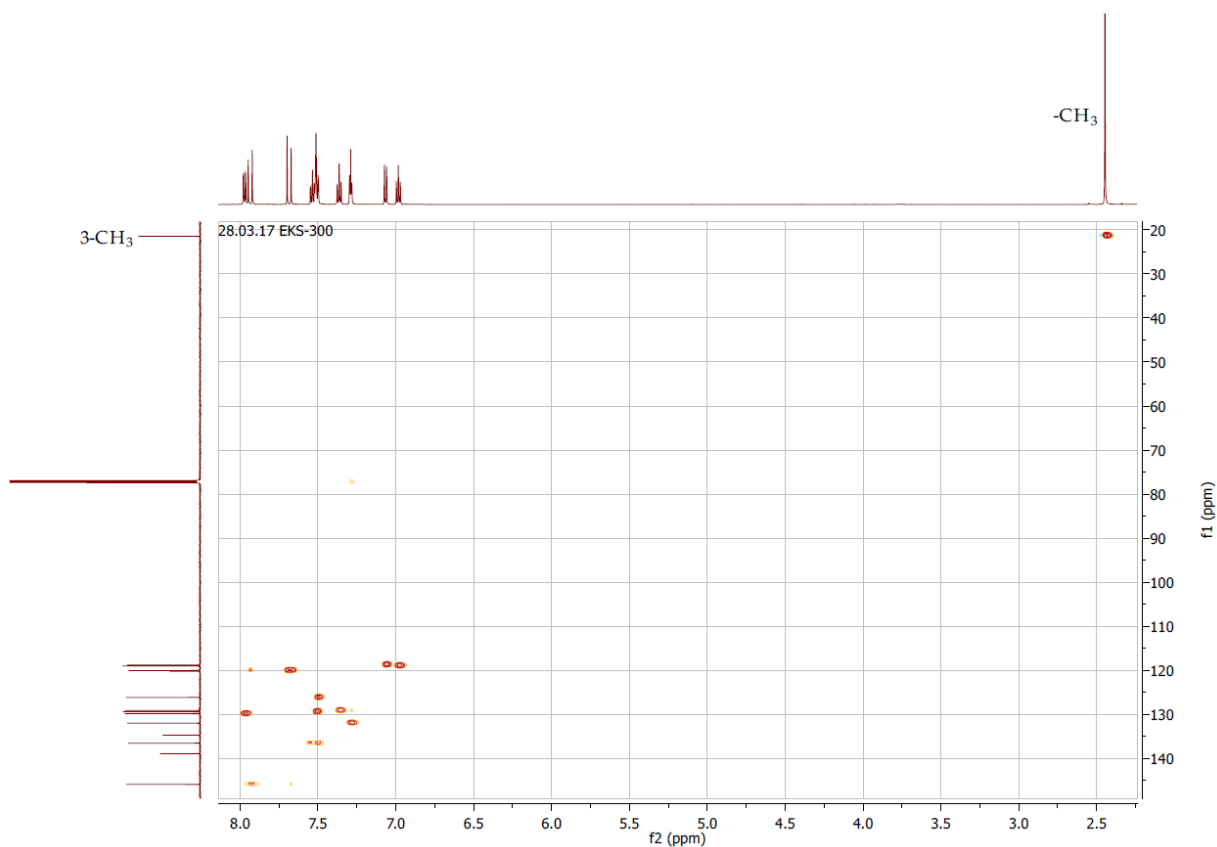

**Figure S9.** HSQC contour map –  $^1\text{H} \times ^{13}\text{C}$  expansion of 2'-hydroxy-3-methylchalcone (6A)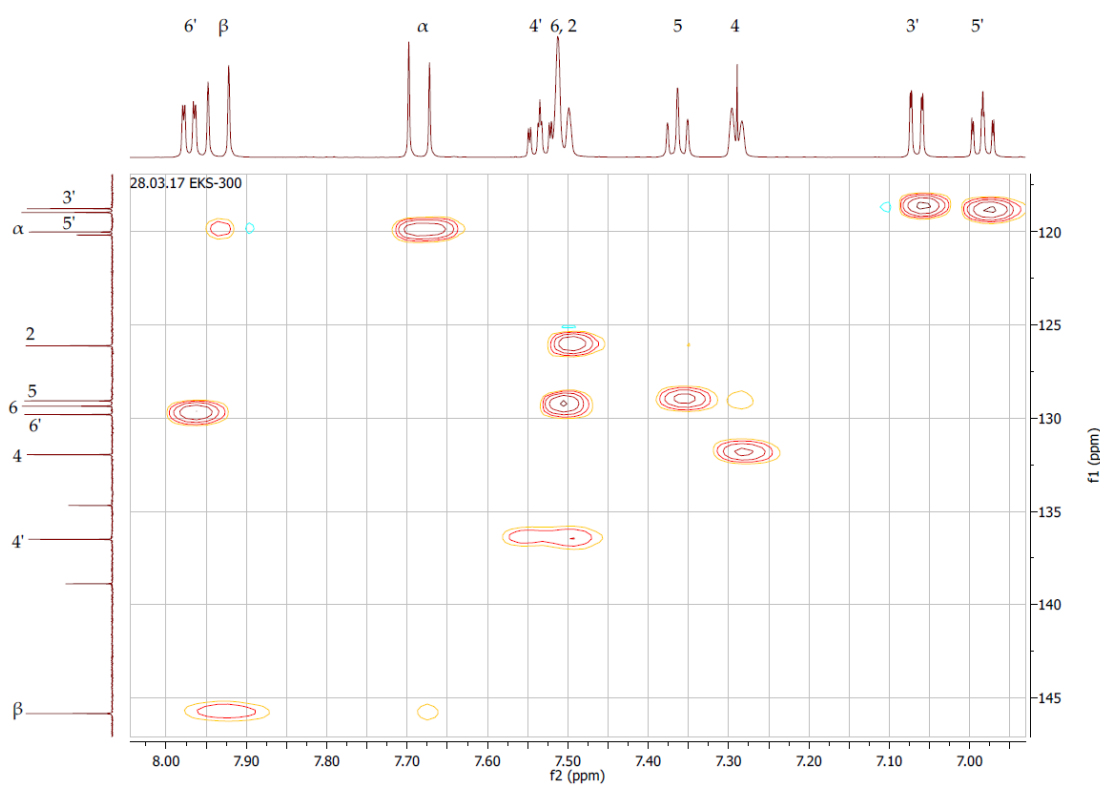**Figure S10.** HMBC contour map –  $^1\text{H} \times ^{13}\text{C}$  of 2'-hydroxy-3-methylchalcone (6A)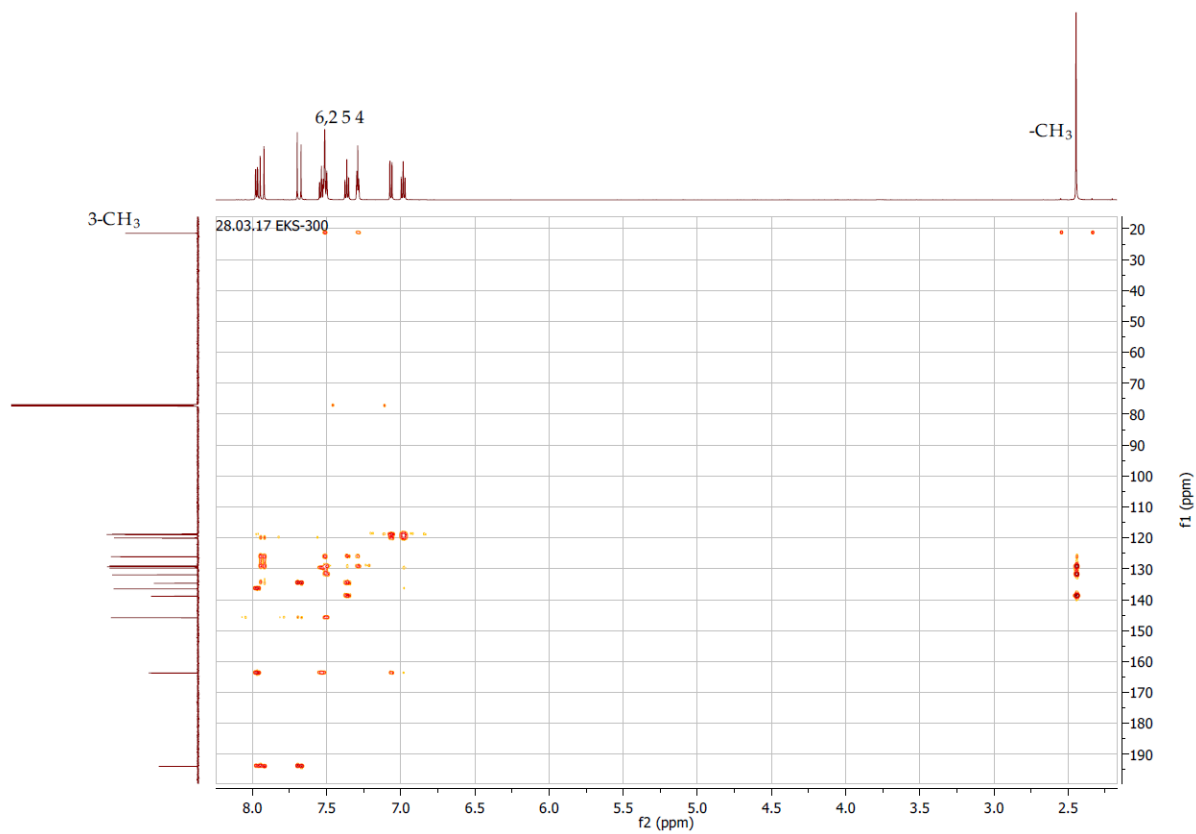

**Figure S11.** HMBC contour map –  $^1\text{H} \times ^{13}\text{C}$  expansion of 2'-hydroxy-3-methylchalcone (6A)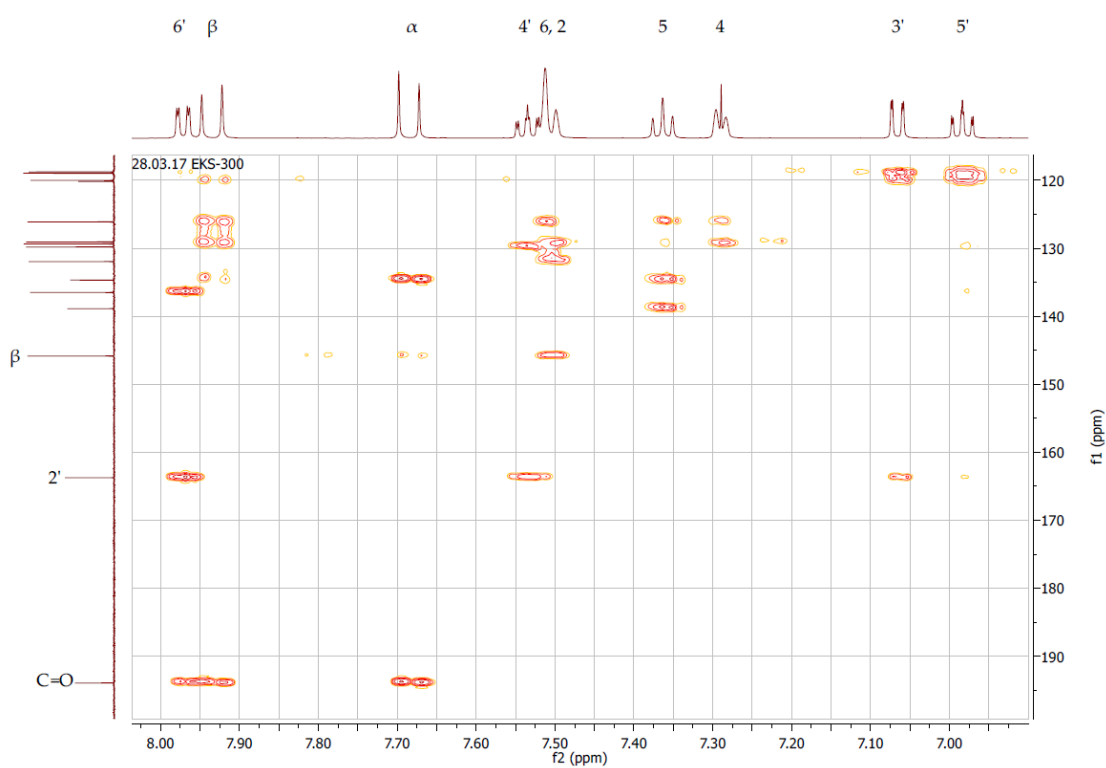**Figure S12.** HMBC contour map –  $^1\text{H} \times ^{13}\text{C}$  expansion of 2'-hydroxy-3-methylchalcone (6A)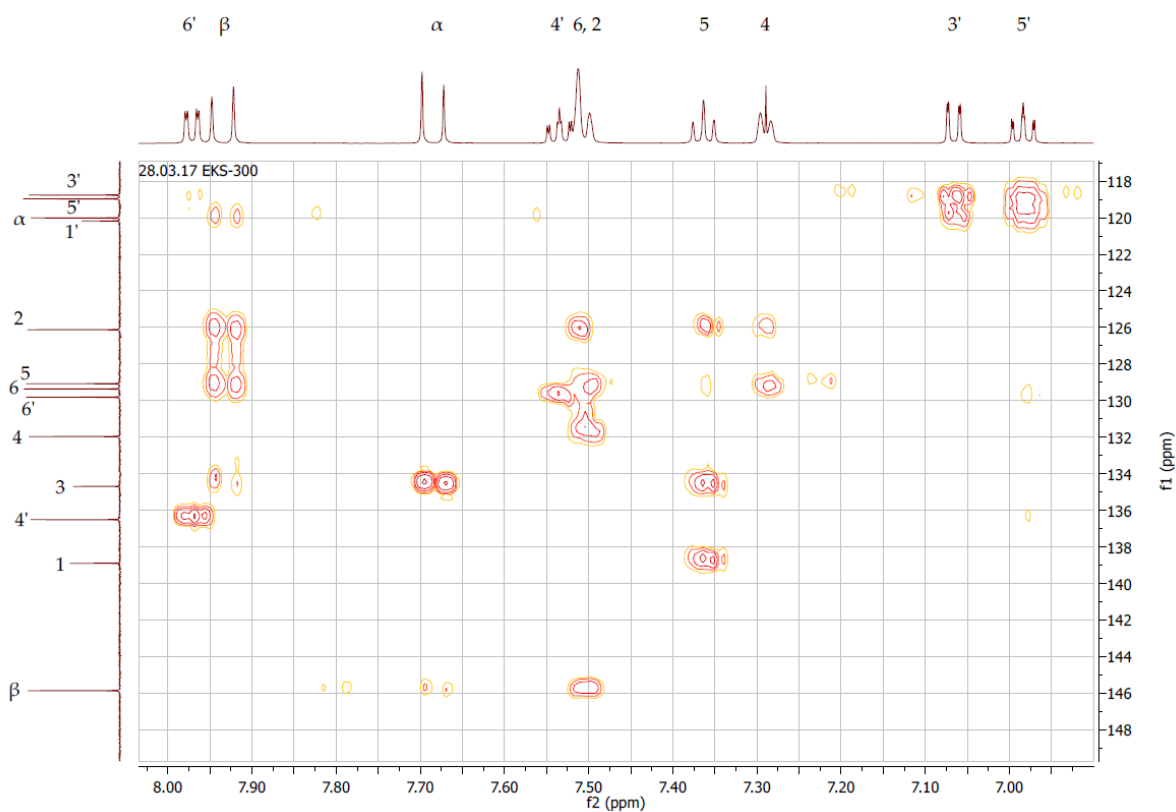



**Figure S13.** MS analysis of 3'-methylflavanone (6B)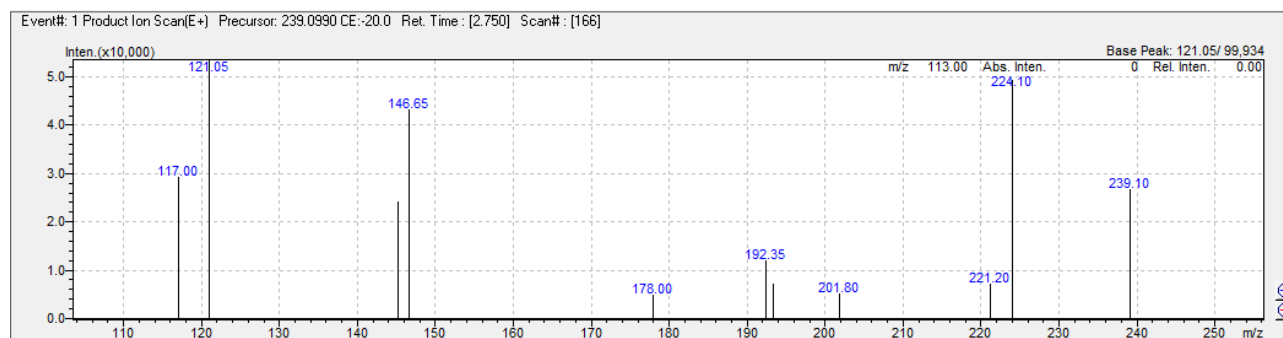**Figure S14.**  $^1\text{H}$  NMR spectrum ( $\delta$ , acetone- $d_6$ , 600 MHz) of 3'-methylflavanone (6B)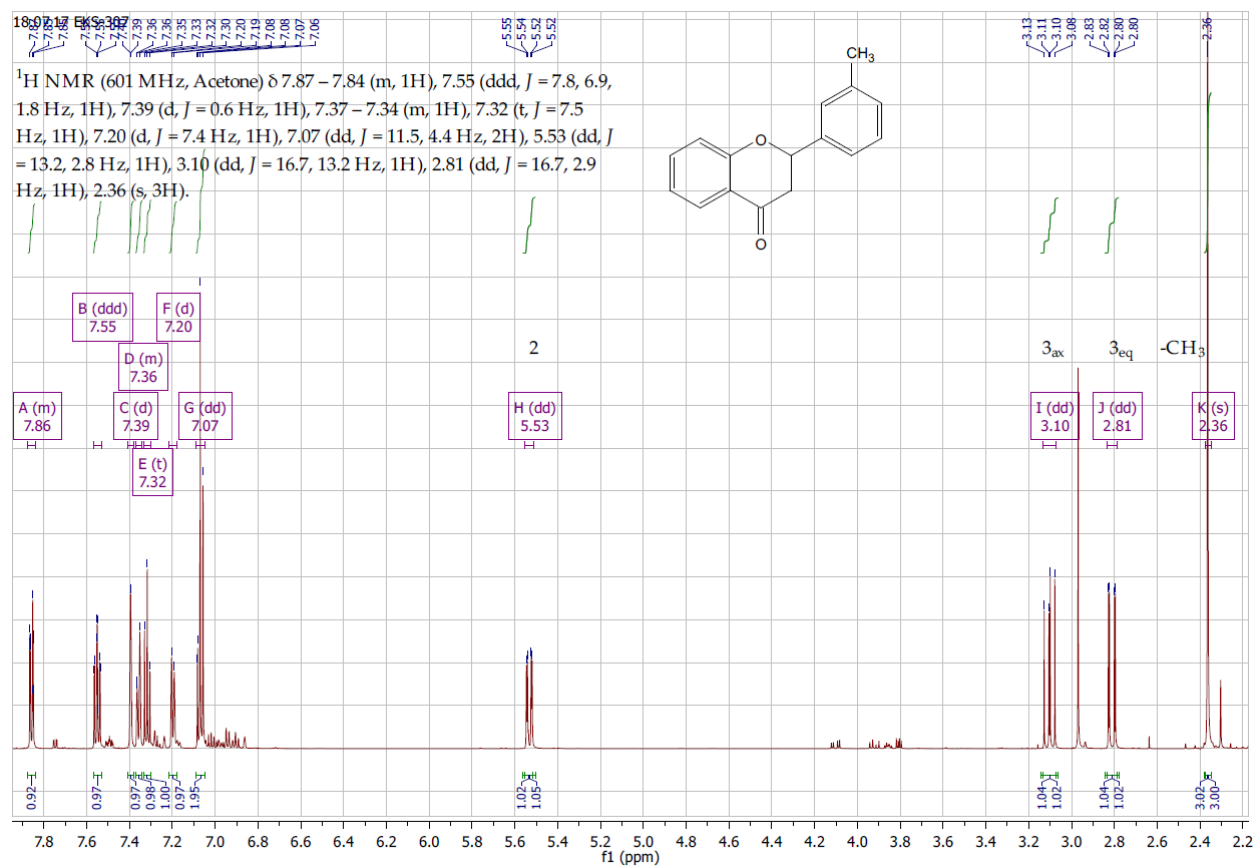

**Figure S15.**  $^1\text{H}$  NMR spectrum expansion ( $\delta$ , acetone- $d_6$ , 600 MHz) of 3'-methylflavanone (**6B**)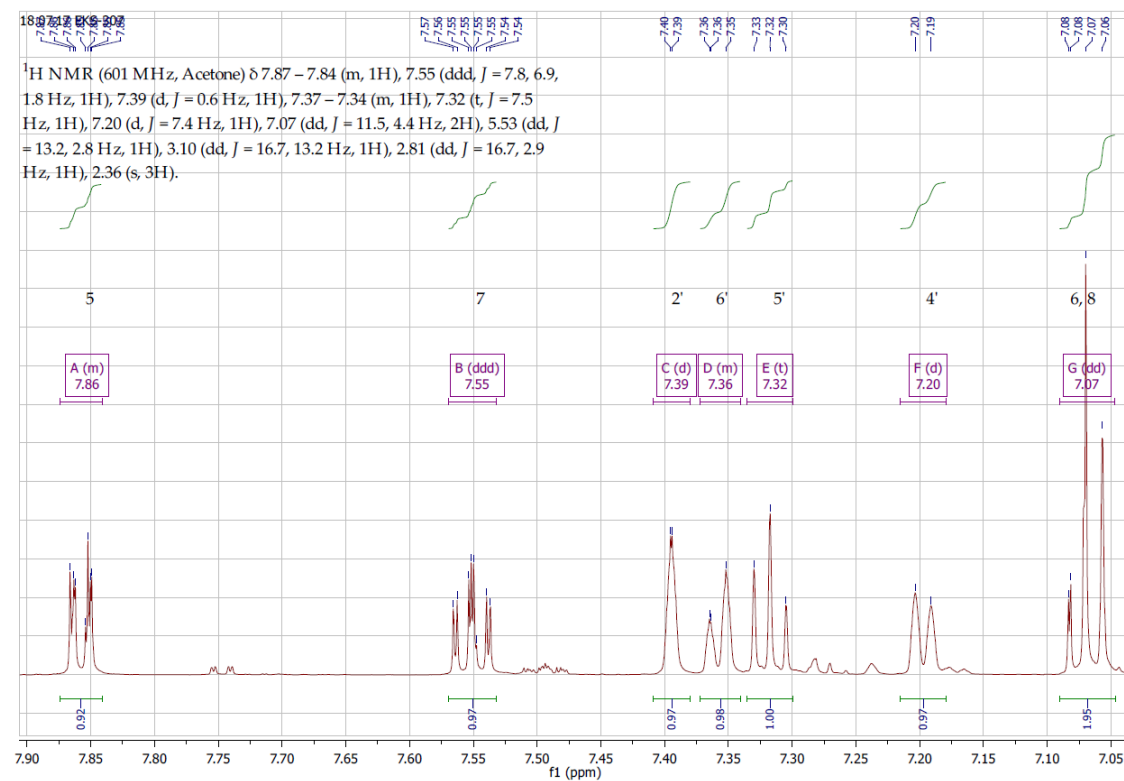**Figure S16.**  $^{13}\text{C}$  NMR spectrum ( $\delta$ , acetone- $d_6$ , 151 MHz) of 3'-methylflavanone (**6B**)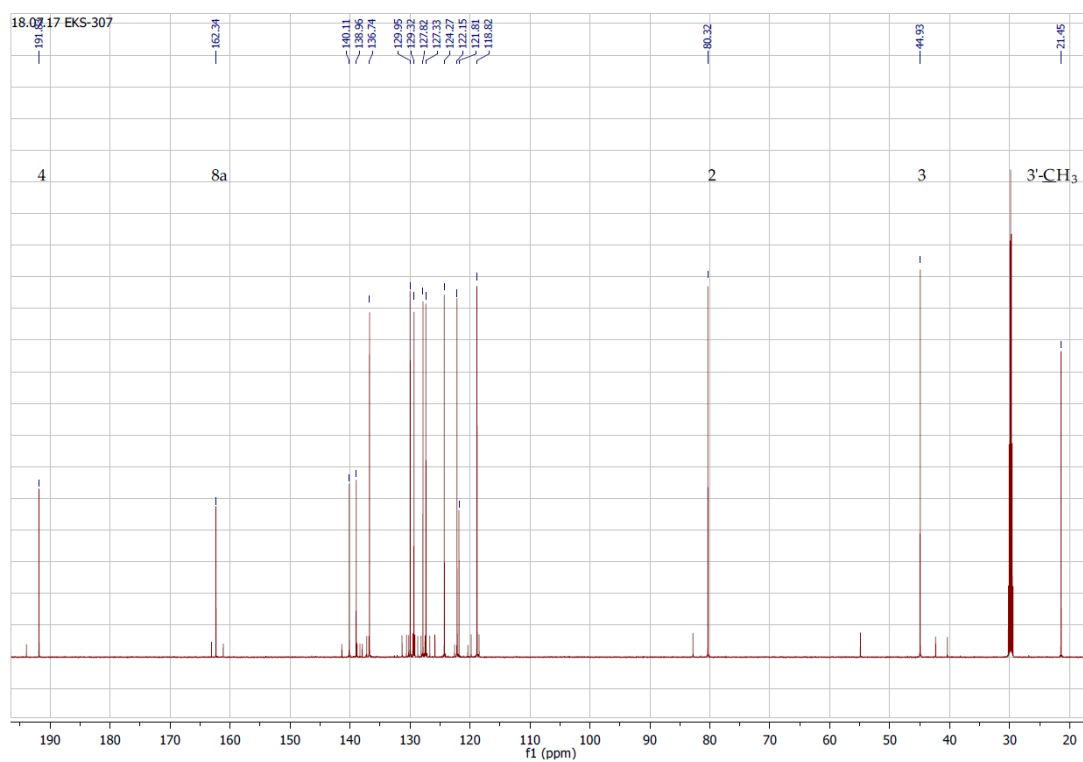

**Figure S17.**  $^{13}\text{C}$  NMR spectrum expansion ( $\delta$ , acetone- $d_6$ , 151 MHz) of 3'-methylflavanone (**6B**)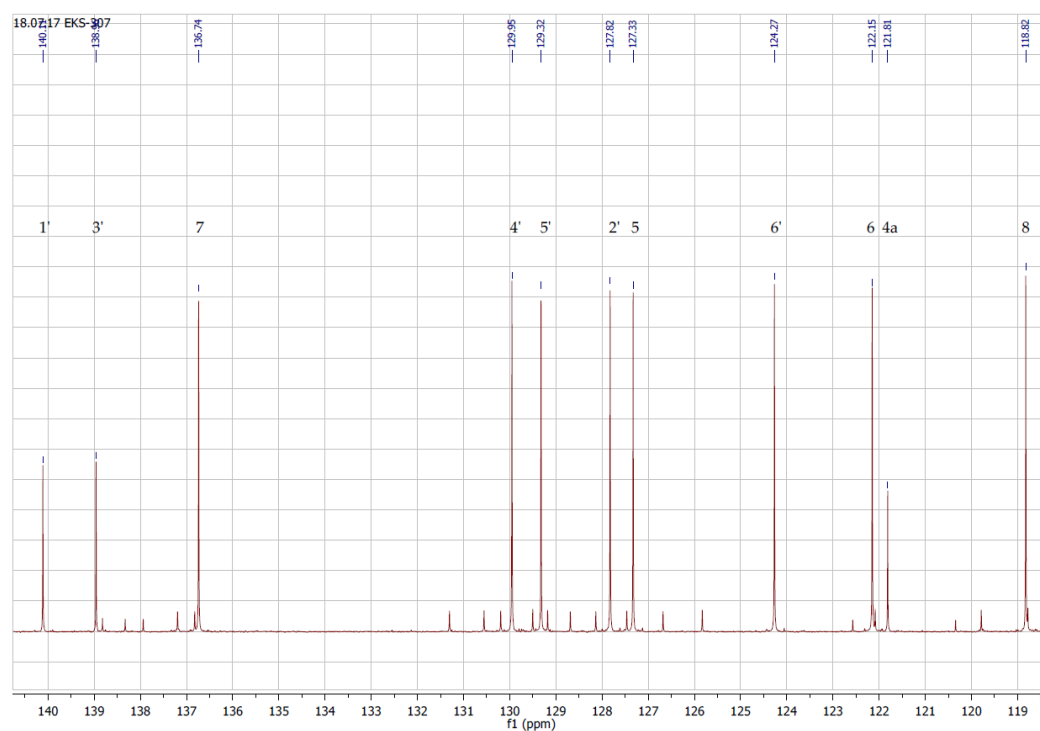**Figure S18.** COSY contour map –  $^1\text{H} \times ^1\text{H}$  of 3'-methylflavanone (**6B**)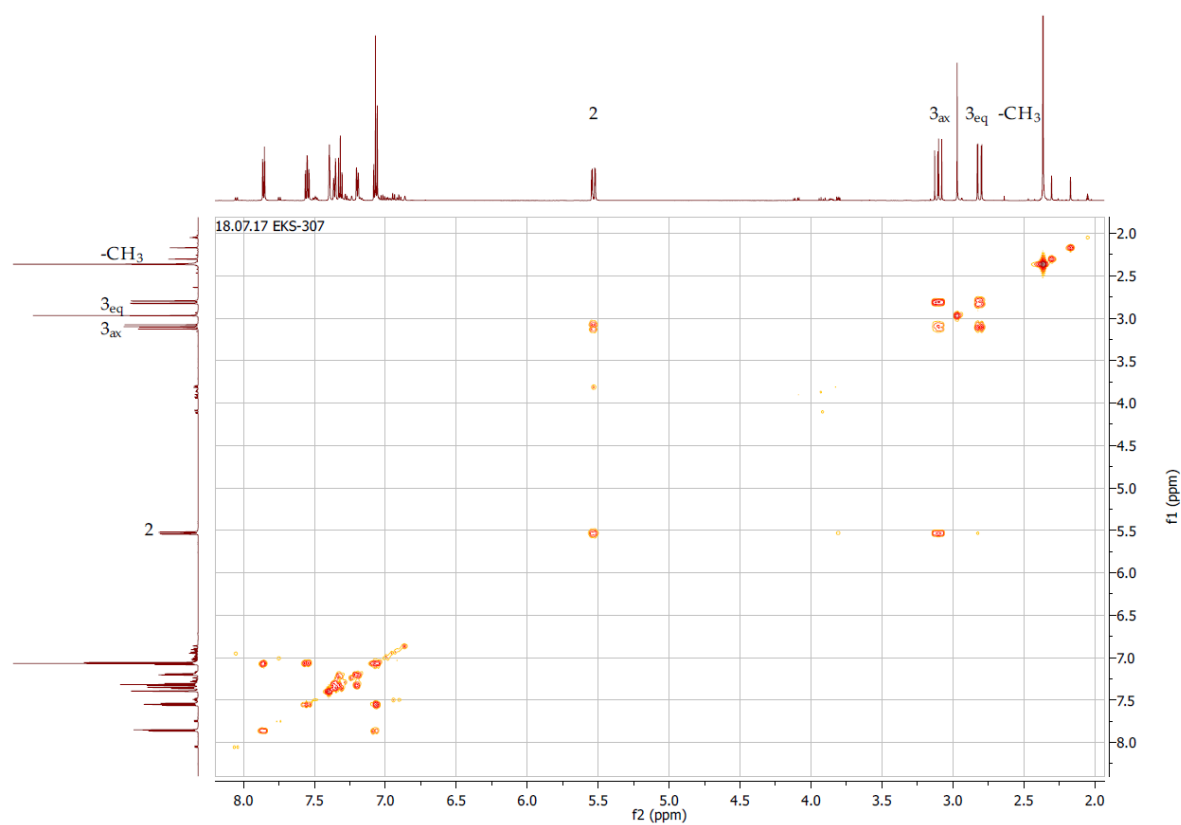

**Figure S19.** COSY contour map –  $^1\text{H} \times ^1\text{H}$  expansion of 3'-methylflavanone (**6B**)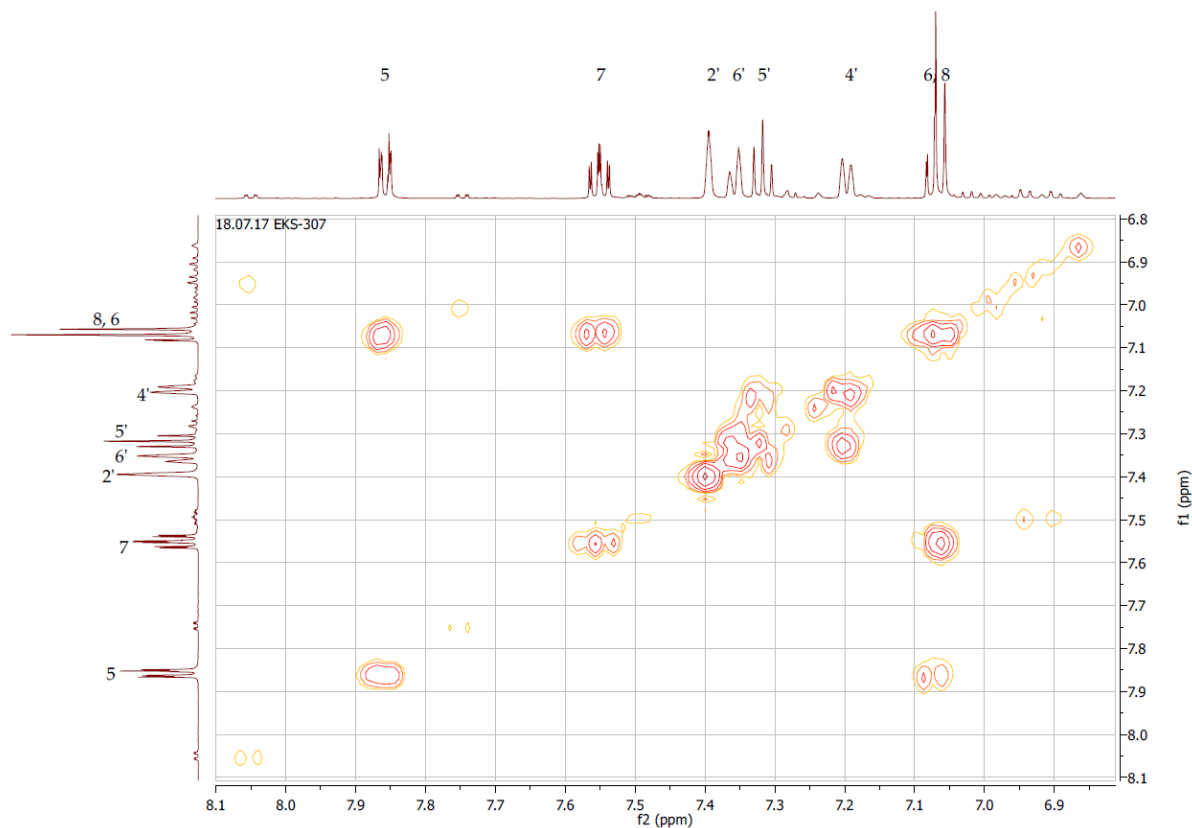**Figure S20.** HSQC contour map –  $^1\text{H} \times ^{13}\text{C}$  of 3'-methylflavanone (**6B**)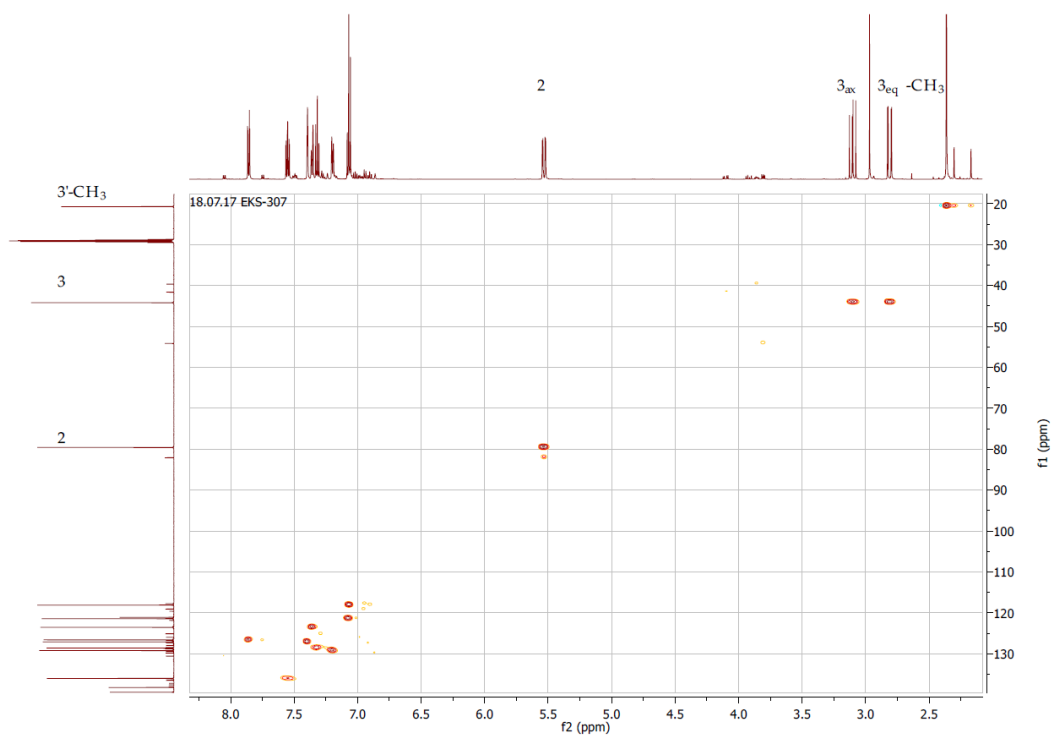

**Figure S21.** HSQC contour map –  $^1\text{H} \times ^{13}\text{C}$  expansion of 3'-methylflavanone (6B)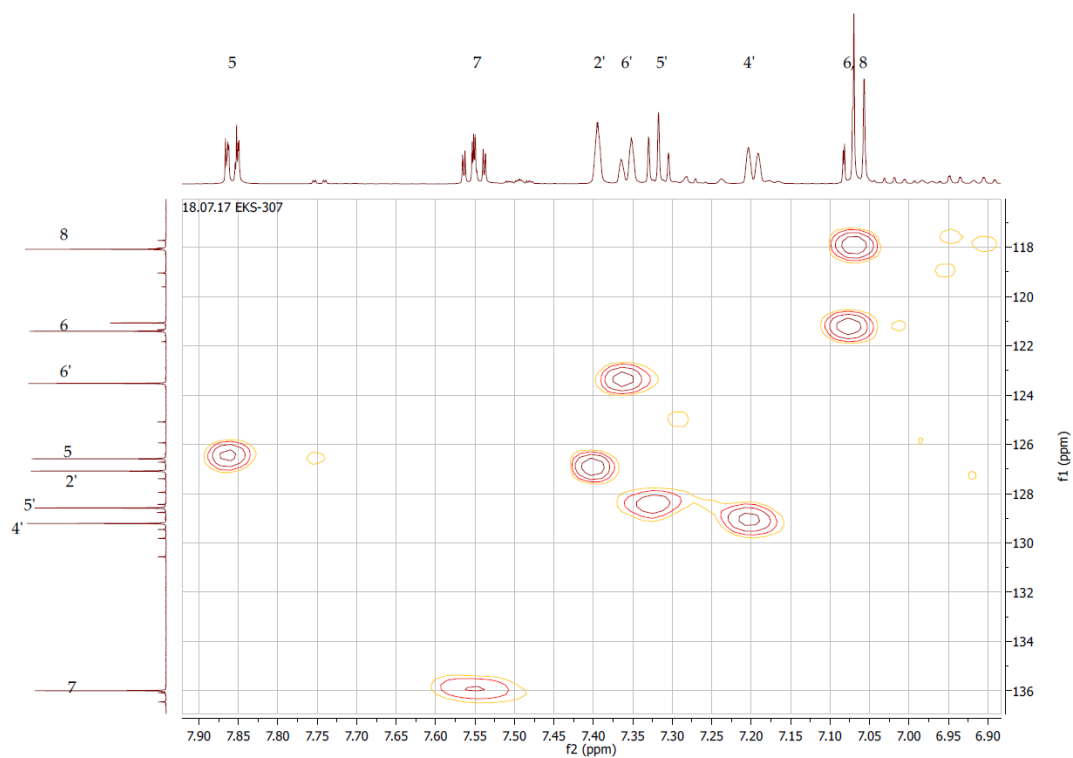**Figure S22.** HMBC contour map –  $^1\text{H} \times ^{13}\text{C}$  expansion of 3'-methylflavanone (6B)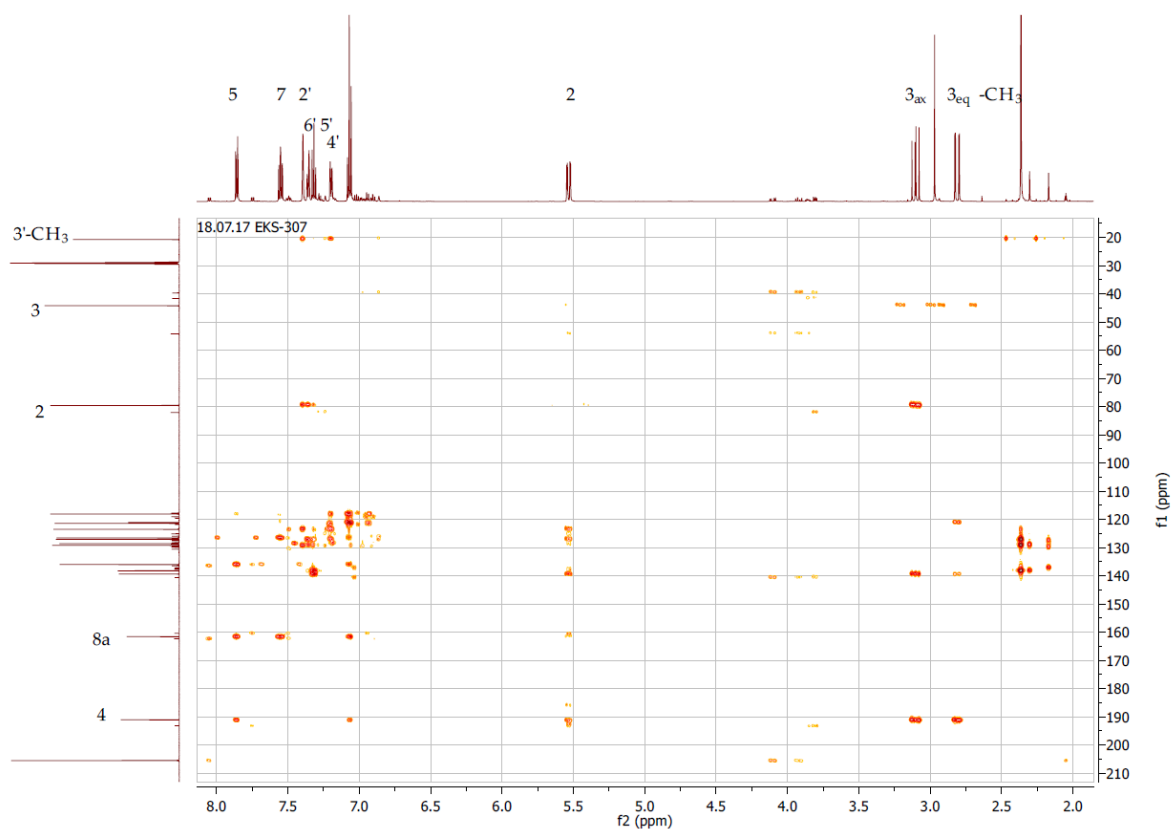

**Figure S23.** HMBC contour map –  $^1\text{H} \times ^{13}\text{C}$  expansion of 3'-methylflavanone (**6B**)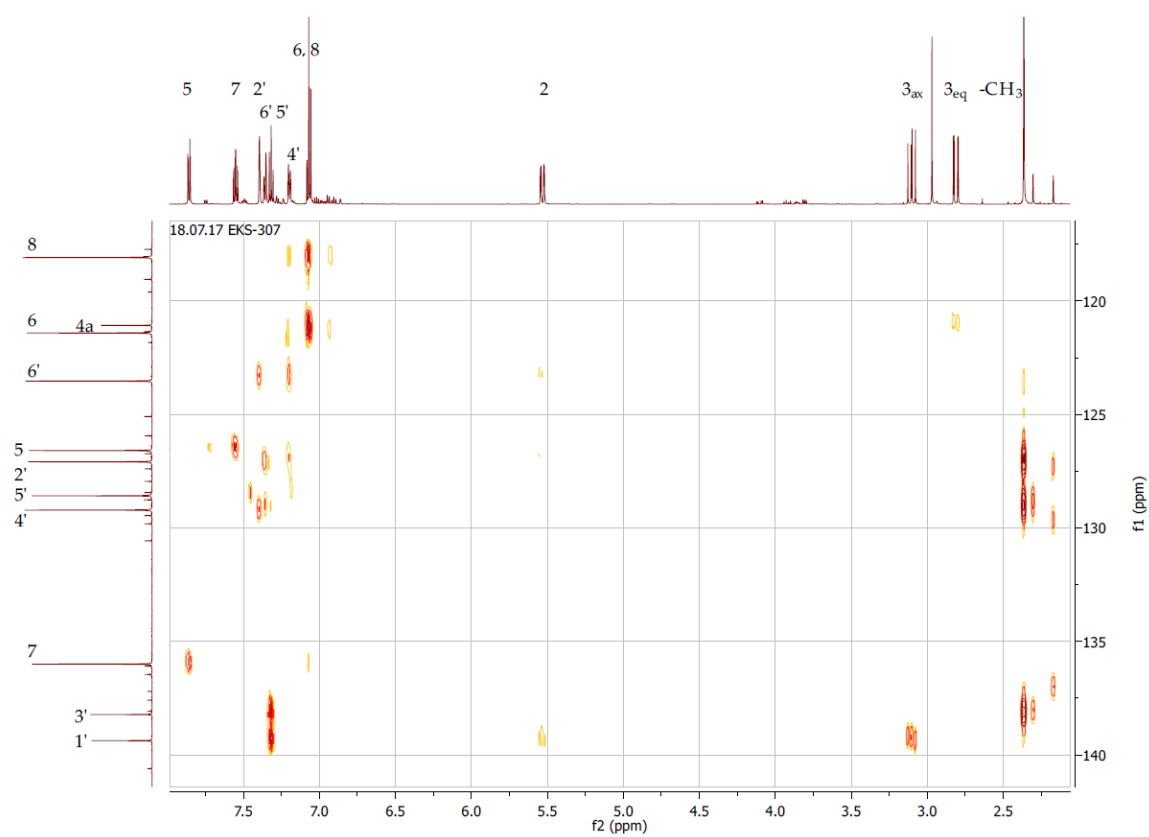

**Table S1.** The effect of methyl-derivatives of flavanone on the production IL-1 $\beta$  in compared to control in LPS stimulated RAW264.1 cells (n=3). Statistical significance was analysed using Fisher's LSD test. Results marked in red are statistically significant in Fisher's LSD test. Multivariate Tests of Significance (F = 7.499, p < 0.05).

|                                         |                                    |          |          |          |          |          |          |          |          |          |          |          |
|-----------------------------------------|------------------------------------|----------|----------|----------|----------|----------|----------|----------|----------|----------|----------|----------|
|                                         | Multivariate Tests of Significance |          |          |          |          |          |          |          |          |          |          |          |
|                                         | Sigma-restricted parameterization  |          |          |          |          |          |          |          |          |          |          |          |
|                                         | Effective hypothesis decomposition |          |          |          |          |          |          |          |          |          |          |          |
| Effect                                  | Test                               | Value    | F        | Effect   | Error    | p        |          |          |          |          |          |          |
| Intercept                               | Wilks                              | 0.001581 | 2273.118 | 5        | 18.00000 | 0.000000 |          |          |          |          |          |          |
| sample                                  | Wilks                              | 0.000462 | 7.499    | 50       | 85.45684 | 0.000000 |          |          |          |          |          |          |
|                                         |                                    |          |          |          |          |          |          |          |          |          |          |          |
| LSD test; variable IL-1β (sta-zabrze)   |                                    |          |          |          |          |          |          |          |          |          |          |          |
| Probabilities for Post Hoc Tests        |                                    |          |          |          |          |          |          |          |          |          |          |          |
| Error: Between MS = 6,1378, df = 22,000 |                                    |          |          |          |          |          |          |          |          |          |          |          |
| Cell No.                                | sample                             | {1}      | {2}      | {3}      | {4}      | {5}      | {6}      | {7}      | {8}      | {9}      | {10}     | {11}     |
| 1                                       | K DMSO + LPS                       |          | 0.880882 | 0.318805 | 0.009652 | 0.006865 | 0.757877 | 0.963008 | 0.032619 | 0.612231 | 0.875184 | 0.538352 |
| 2                                       | 5B 1μM + LPS                       | 0.880882 |          | 0.253881 | 0.006813 | 0.004823 | 0.647391 | 0.917569 | 0.044695 | 0.720358 | 0.994230 | 0.640541 |
| 3                                       | 5B 20μM + LPS                      | 0.318805 | 0.253881 |          | 0.083296 | 0.062462 | 0.486448 | 0.297571 | 0.003257 | 0.139229 | 0.251016 | 0.114164 |
| 4                                       | 6B 1μM + LPS                       | 0.009652 | 0.006813 | 0.083296 |          | 0.883452 | 0.019403 | 0.008671 | 0.000040 | 0.002907 | 0.006699 | 0.002231 |
| 5                                       | 6B 20μM + LPS                      | 0.006865 | 0.004823 | 0.062462 | 0.883452 |          | 0.013973 | 0.006158 | 0.000028 | 0.002040 | 0.004741 | 0.001562 |
| 6                                       | 7B 1μM + LPS                       | 0.757877 | 0.647391 | 0.486448 | 0.019403 | 0.013973 |          | 0.722984 | 0.016612 | 0.417480 | 0.642240 | 0.358826 |
| 7                                       | 7B 20μM + LPS                      | 0.963008 | 0.917569 | 0.297571 | 0.008671 | 0.006158 | 0.722984 |          | 0.035993 | 0.644880 | 0.911834 | 0.569024 |
| 8                                       | 8B 1μM + LPS                       | 0.032619 | 0.044695 | 0.003257 | 0.000040 | 0.000028 | 0.016612 | 0.035993 |          | 0.091209 | 0.045369 | 0.112020 |
| 9                                       | 8B 20μM + LPS                      | 0.612231 | 0.720358 | 0.139229 | 0.002907 | 0.002040 | 0.417480 | 0.644880 | 0.091209 |          | 0.725753 | 0.912729 |
| 10                                      | flawanon 1μM + LPS                 | 0.875184 | 0.994230 | 0.251016 | 0.006699 | 0.004741 | 0.642240 | 0.911834 | 0.045369 | 0.725753 |          | 0.645685 |
| 11                                      | flawanon 20μM + LPS                | 0.538352 | 0.640541 | 0.114164 | 0.002231 | 0.001562 | 0.358826 | 0.569024 | 0.112020 | 0.912729 | 0.645685 |          |

**Table S2.** The effect of methyl-derivatives of flavanone on the production IL-6 in compared to control in LPS stimulated RAW264.1 cells (n=3). Statistical significance was analysed using Fisher's LSD test. Results marked in red are statistically significant in Fisher's LSD test. Multivariate Tests of Significance (F = 7.499, p < 0.05).

LSD test; variable **IL-6**

Probabilities for Post Hoc Tests

Error: Between MS = 25771,, df = 22,000

|    | sample              | {1}      | {2}      | {3}      | {4}      | {5}      | {6}      | {7}      | {8}      | {9}      | {10}     | {11}     |
|----|---------------------|----------|----------|----------|----------|----------|----------|----------|----------|----------|----------|----------|
| 1  | K DMSO + LPS        |          | 0.014881 | 0.000133 | 0.018428 | 0.000066 | 0.002296 | 0.804608 | 0.001515 | 0.735847 | 0.253626 | 0.005065 |
| 2  | 5B 1µM + LPS        | 0.014881 |          | 0.060733 | 0.923936 | 0.033538 | 0.000004 | 0.008447 | 0.000003 | 0.006845 | 0.000947 | 0.000009 |
| 3  | 5B 20µM + LPS       | 0.000133 | 0.060733 |          | 0.050051 | 0.774094 | 0.000000 | 0.000072 | 0.000000 | 0.000058 | 0.000008 | 0.000000 |
| 4  | 6B 1µM + LPS        | 0.018428 | 0.923936 | 0.050051 |          | 0.027329 | 0.000005 | 0.010529 | 0.000003 | 0.008550 | 0.001197 | 0.000011 |
| 5  | 6B 20µM + LPS       | 0.000066 | 0.033538 | 0.774094 | 0.027329 |          | 0.000000 | 0.000036 | 0.000000 | 0.000029 | 0.000004 | 0.000000 |
| 6  | 7B 1µM + LPS        | 0.002296 | 0.000004 | 0.000000 | 0.000005 | 0.000000 |          | 0.004162 | 0.864110 | 0.005156 | 0.032999 | 0.741529 |
| 7  | 7B 20µM + LPS       | 0.804608 | 0.008447 | 0.000072 | 0.010529 | 0.000036 | 0.004162 |          | 0.002761 | 0.928103 | 0.366591 | 0.009041 |
| 8  | 8B 1µM + LPS        | 0.001515 | 0.000003 | 0.000000 | 0.000003 | 0.000000 | 0.864110 | 0.002761 |          | 0.003430 | 0.022795 | 0.617078 |
| 9  | 8B 20µM + LPS       | 0.735847 | 0.006845 | 0.000058 | 0.008550 | 0.000029 | 0.005156 | 0.928103 | 0.003430 |          | 0.415118 | 0.011128 |
| 10 | flavanon 1µM + LPS  | 0.253626 | 0.000947 | 0.000008 | 0.001197 | 0.000004 | 0.032999 | 0.366591 | 0.022795 | 0.415118 |          | 0.065170 |
| 11 | flavanon 20µM + LPS | 0.005065 | 0.000009 | 0.000000 | 0.000011 | 0.000000 | 0.741529 | 0.009041 | 0.617078 | 0.011128 | 0.065170 |          |



**Table S3.** The effect of methyl-derivatives of flavanone on the production IL-6 in compared to control in LPS stimulated RAW264.1 cells (n=3). Statistical significance was analysed using Fisher's LSD test. Results marked in red are statistically significant in Fisher's LSD test. Multivariate Tests of Significance (F = 7.499, p < 0.05).

LSD test; variable **IL-12p40**

Probabilities for Post Hoc Tests

Error: Between MS = 10,535, df = 22,000

|    | sample              | {1}      | {2}      | {3}      | {4}      | {5}      | {6}      | {7}      | {8}      | {9}      | {10}     | {11}     |
|----|---------------------|----------|----------|----------|----------|----------|----------|----------|----------|----------|----------|----------|
| 1  | K DMSO + LPS        |          | 0.001031 | 0.000307 | 0.038380 | 0.010886 | 0.065044 | 0.232104 | 0.362711 | 0.365265 | 0.205639 | 0.946897 |
| 2  | 5B 1µM + LPS        | 0.001031 |          | 0.624142 | 0.129111 | 0.328996 | 0.079665 | 0.018222 | 0.009310 | 0.009203 | 0.021488 | 0.000875 |
| 3  | 5B 20µM + LPS       | 0.000307 | 0.624142 |          | 0.050010 | 0.149056 | 0.029096 | 0.005902 | 0.002917 | 0.002882 | 0.007030 | 0.000260 |
| 4  | 6B 1µM + LPS        | 0.038380 | 0.129111 | 0.050010 |          | 0.568785 | 0.796677 | 0.340662 | 0.216194 | 0.214448 | 0.378589 | 0.033339 |
| 5  | 6B 20µM + LPS       | 0.010886 | 0.328996 | 0.149056 | 0.568785 |          | 0.410318 | 0.134813 | 0.077516 | 0.076769 | 0.153812 | 0.009340 |
| 6  | 7B 1µM + LPS        | 0.065044 | 0.079665 | 0.029096 | 0.796677 | 0.410318 |          | 0.483236 | 0.322293 | 0.319948 | 0.530175 | 0.056918 |
| 7  | 7B 20µM + LPS       | 0.232104 | 0.018222 | 0.005902 | 0.340662 | 0.134813 | 0.483236 |          | 0.767478 | 0.763693 | 0.940615 | 0.208327 |
| 8  | 8B 1µM + LPS        | 0.362711 | 0.009310 | 0.002917 | 0.216194 | 0.077516 | 0.322293 | 0.767478 |          | 0.996031 | 0.711464 | 0.329661 |
| 9  | 8B 20µM + LPS       | 0.365265 | 0.009203 | 0.002882 | 0.214448 | 0.076769 | 0.319948 | 0.763693 | 0.996031 |          | 0.707779 | 0.332055 |
| 10 | flawanon 1µM + LPS  | 0.205639 | 0.021488 | 0.007030 | 0.378589 | 0.153812 | 0.530175 | 0.940615 | 0.711464 | 0.707779 |          | 0.184018 |
| 11 | flawanon 20µM + LPS | 0.946897 | 0.000875 | 0.000260 | 0.033339 | 0.009340 | 0.056918 | 0.208327 | 0.329661 | 0.332055 | 0.184018 |          |

**Table S4.** The effect of methyl-derivatives of flavanone on the production IL-12p70 in compared to control in LPS stimulated RAW264.1 cells (n=3). Statistical significance was analysed using Fisher's LSD test. Results marked in red are statistically significant in Fisher's LSD test. Multivariate Tests of Significance ( $F = 7.499$ ,  $p < 0.05$ ).

LSD test; variable **IL-12p70**

Probabilities for Post Hoc Tests

Error: Between MS = 15,184, df = 22,000

| Cell No. | sample                    | {1}      | {2}      | {3}      | {4}      | {5}      | {6}      | {7}      | {8}      | {9}      | {10}     | {11}     |
|----------|---------------------------|----------|----------|----------|----------|----------|----------|----------|----------|----------|----------|----------|
| 1        | K DMSO + LPS              |          | 0.003850 | 0.000410 | 0.000050 | 0.000010 | 0.264156 | 0.005071 | 0.121969 | 0.000408 | 0.111074 | 0.570728 |
| 2        | 5B 1 $\mu$ M + LPS        | 0.003850 |          | 0.363357 | 0.086633 | 0.021724 | 0.000241 | 0.000002 | 0.000078 | 0.000000 | 0.000069 | 0.014484 |
| 3        | 5B 20 $\mu$ M + LPS       | 0.000410 | 0.363357 |          | 0.396171 | 0.137294 | 0.000025 | 0.000000 | 0.000008 | 0.000000 | 0.000007 | 0.001660 |
| 4        | 6B 1 $\mu$ M + LPS        | 0.000050 | 0.086633 | 0.396171 |          | 0.505590 | 0.000003 | 0.000000 | 0.000001 | 0.000000 | 0.000001 | 0.000202 |
| 5        | 6B 20 $\mu$ M + LPS       | 0.000010 | 0.021724 | 0.137294 | 0.505590 |          | 0.000001 | 0.000000 | 0.000000 | 0.000000 | 0.000000 | 0.000039 |
| 6        | 7B 1 $\mu$ M + LPS        | 0.264156 | 0.000241 | 0.000025 | 0.000003 | 0.000001 |          | 0.061933 | 0.648135 | 0.006379 | 0.612198 | 0.099198 |
| 7        | 7B 20 $\mu$ M + LPS       | 0.005071 | 0.000002 | 0.000000 | 0.000000 | 0.000000 | 0.061933 |          | 0.146748 | 0.306270 | 0.160439 | 0.001286 |
| 8        | 8B 1 $\mu$ M + LPS        | 0.121969 | 0.000078 | 0.000008 | 0.000001 | 0.000000 | 0.648135 | 0.146748 |          | 0.018187 | 0.959332 | 0.039895 |
| 9        | 8B 20 $\mu$ M + LPS       | 0.000408 | 0.000000 | 0.000000 | 0.000000 | 0.000000 | 0.006379 | 0.306270 | 0.018187 |          | 0.020364 | 0.000100 |
| 10       | flavanon 1 $\mu$ M + LPS  | 0.111074 | 0.000069 | 0.000007 | 0.000001 | 0.000000 | 0.612198 | 0.160439 | 0.959332 | 0.020364 |          | 0.035837 |
| 11       | flavanon 20 $\mu$ M + LPS | 0.570728 | 0.014484 | 0.001660 | 0.000202 | 0.000039 | 0.099198 | 0.001286 | 0.039895 | 0.000100 | 0.035837 |          |

**Table S5.** The effect of methyl-derivatives of flavanone on the production TNF- $\alpha$  in compared to control in LPS stimulated RAW264.1 cells (n=3). Statistical significance was analysed using Fisher's LSD test. Results marked in red are statistically significant in Fisher's LSD test. Multivariate Tests of Significance (F = 7.499, p < 0.05).

LSD test; variable **TNF- $\alpha$**

Probabilities for Post Hoc Tests

Error: Between MS = 3334E4, df = 22,000

|    | sample                    | {1}      | {2}      | {3}      | {4}      | {5}      | {6}      | {7}      | {8}      | {9}      | {10}     | {11}     |
|----|---------------------------|----------|----------|----------|----------|----------|----------|----------|----------|----------|----------|----------|
| 1  | K DMSO + LPS              |          | 0.000296 | 0.000095 | 0.826990 | 0.974889 | 0.927038 | 0.373381 | 0.531949 | 0.069246 | 0.571884 | 0.008844 |
| 2  | 5B 1 $\mu$ M + LPS        | 0.000296 |          | 0.646828 | 0.000172 | 0.000274 | 0.000236 | 0.000032 | 0.000063 | 0.000003 | 0.000073 | 0.000000 |
| 3  | 5B 20 $\mu$ M + LPS       | 0.000095 | 0.646828 |          | 0.000056 | 0.000088 | 0.000076 | 0.000011 | 0.000021 | 0.000001 | 0.000024 | 0.000000 |
| 4  | 6B 1 $\mu$ M + LPS        | 0.826990 | 0.000172 | 0.000056 |          | 0.851557 | 0.898877 | 0.498972 | 0.682982 | 0.105365 | 0.727688 | 0.014581 |
| 5  | 6B 20 $\mu$ M + LPS       | 0.974889 | 0.000274 | 0.000088 | 0.851557 |          | 0.952075 | 0.390062 | 0.552539 | 0.073666 | 0.593252 | 0.009512 |
| 6  | 7B 1 $\mu$ M + LPS        | 0.927038 | 0.000236 | 0.000076 | 0.898877 | 0.952075 |          | 0.423234 | 0.592983 | 0.082795 | 0.635104 | 0.010921 |
| 7  | 7B 20 $\mu$ M + LPS       | 0.373381 | 0.000032 | 0.000011 | 0.498972 | 0.390062 | 0.423234 |          | 0.786939 | 0.327509 | 0.740952 | 0.062300 |
| 8  | 8B 1 $\mu$ M + LPS        | 0.531949 | 0.000063 | 0.000021 | 0.682982 | 0.552539 | 0.592983 | 0.786939 |          | 0.215599 | 0.951763 | 0.035704 |
| 9  | 8B 20 $\mu$ M + LPS       | 0.069246 | 0.000003 | 0.000001 | 0.105365 | 0.073666 | 0.082795 | 0.327509 | 0.215599 |          | 0.195135 | 0.346267 |
| 10 | flawanon 1 $\mu$ M + LPS  | 0.571884 | 0.000073 | 0.000024 | 0.727688 | 0.593252 | 0.635104 | 0.740952 | 0.951763 | 0.195135 |          | 0.031395 |
| 11 | flawanon 20 $\mu$ M + LPS | 0.008844 | 0.000000 | 0.000000 | 0.014581 | 0.009512 | 0.010921 | 0.062300 | 0.035704 | 0.346267 | 0.031395 |          |

**Table S6.** Average, standard deviations, statistical significance of cytotoxic activity of methyl-derivatives of flavanone. Statistical significance was calculated using t-test (Table S3).

| Sample               | RAW264.7 cell viability [%] |       |             |
|----------------------|-----------------------------|-------|-------------|
|                      | AVG                         | SD    | <i>p</i>    |
| Control              | 97.83                       | 3.14  |             |
| 5B 1 $\mu$ M         | 111.04                      | 12.65 | 0.114254581 |
| 5B 10 $\mu$ M        | 97.93                       | 4.94  | 0.268060958 |
| 5B 20 $\mu$ M        | 92.17                       | 8.00  | 0.09701206  |
| 6B 1 $\mu$ M         | 92.47                       | 1.93  | 0.182880144 |
| 6B 10 $\mu$ M        | 96.81                       | 2.26  | 0.065944168 |
| 6B 20 $\mu$ M        | 89.21                       | 5.46  | 0.102198598 |
| 7B 1 $\mu$ M         | 91.32                       | 1.82  | 0.001728865 |
| 7B 10 $\mu$ M        | 92.95                       | 2.20  | 0.005413282 |
| 7B 20 $\mu$ M        | 89.71                       | 2.74  | 0.006185175 |
| 8B 1 $\mu$ M         | 94.67                       | 5.34  | 0.140268954 |
| 8B 10 $\mu$ M        | 90.45                       | 2.85  | 0.002481306 |
| 8B 20 $\mu$ M        | 88.45                       | 3.41  | 0.002088066 |
| Flavanone 1 $\mu$ M  | 94.46                       | 2.78  | 0.020122714 |
| Flavanone 10 $\mu$ M | 97.94                       | 0.87  | 0.124969323 |
| Flavanone 20 $\mu$ M | 97.82                       | 3.10  | 0.287500787 |

**Table S7.** Average, standard deviations, statistical significance of chemiluminescence of methyl-derivatives of flavanone. Statistical significance was calculated using t-test (Table S5).

| Sample         | RAW264.7 cell viability [%] |       |             |
|----------------|-----------------------------|-------|-------------|
|                | AVG                         | SD    | <i>p</i>    |
| 5B 1μM         | 107.16                      | 9.42  | 0.604869355 |
| 5B 5μM         | 102.45                      | 5.02  | 0.006617773 |
| 5B 10μM        | 65.54                       | 5.15  | 0.012756791 |
| 5B 50μM        | 28.50                       | 3.16  | 0.026308649 |
| 6B 1μM         | 94.99                       | 11.99 | 0.093523114 |
| 6B 5μM         | 89.21                       | 9.56  | 0.003180751 |
| 6B 10μM        | 58.68                       | 3.73  | 0.000482798 |
| 6B 50μM        | 18.65                       | 3.41  | 0.000382919 |
| 7B 1μM         | 99.21                       | 11.79 | 0.192650358 |
| 7B 5μM         | 97.11                       | 11.36 | 0.01929824  |
| 7B 10μM        | 68.47                       | 3.39  | 0.010000    |
| 7B 50μM        | 14.85                       | 2.18  | 0.000205425 |
| 8B 1μM         | 127.34                      | 7.14  | 0.063302521 |
| 8B 5μM         | 119.74                      | 5.98  | 0.52493694  |
| 8B 10μM        | 76.15                       | 6.02  | 0.538279569 |
| 8B 50μM        | 34.18                       | 5.47  | 0.562122327 |
| Flavanone 1μM  | 111.36                      | 12.34 |             |
| Flavanone 5μM  | 123.30                      | 6.87  |             |
| Flavanone 10μM | 78.80                       | 3.43  |             |
| Flavanone 50μM | 36.35                       | 4.63  |             |

**Table S8.** The effect of methyl-derivatives of flavanone on the concentration of nitrite in compared to control in LPS stimulated RAW264.1 cells (n=3). Statistical significance was analysed using Fisher's LSD test. Results marked in red are statistically significant in Fisher's LSD test. Multivariate Tests of Significance (F = 7.499, p < 0).

| Effect                                                                                                                          | Univariate Tests of Significance for Concentration of nitrite |          |          |          |          |          |          |          |          |          |          |          |          |          |          |          |          |
|---------------------------------------------------------------------------------------------------------------------------------|---------------------------------------------------------------|----------|----------|----------|----------|----------|----------|----------|----------|----------|----------|----------|----------|----------|----------|----------|----------|
|                                                                                                                                 | SS                                                            | Degr. of | MS       | F        | p        |          |          |          |          |          |          |          |          |          |          |          |          |
| Intercept                                                                                                                       | 62859.92                                                      | 1        | 62859.92 | 26376.71 | 0.00     |          |          |          |          |          |          |          |          |          |          |          |          |
| sample                                                                                                                          | 1885.72                                                       | 15       | 125.71   | 52.75    | 0.00     |          |          |          |          |          |          |          |          |          |          |          |          |
| Error                                                                                                                           | 114.39                                                        | 48       | 2.38     |          |          |          |          |          |          |          |          |          |          |          |          |          |          |
| LSD test; variable Concentration of nitrite (sta-zabrze)Probabilities for Post Hoc TestsError: Between MS = 2,3832, df = 48,000 |                                                               |          |          |          |          |          |          |          |          |          |          |          |          |          |          |          |          |
| Cell No.                                                                                                                        | sample                                                        | {1}      | {2}      | {3}      | {4}      | {5}      | {6}      | {7}      | {8}      | {9}      | {10}     | {11}     | {12}     | {13}     | {14}     | {15}     | {16}     |
| 1                                                                                                                               | K DMSO + LPS                                                  |          | 0.000000 | 0.000000 | 0.000000 | 0.000008 | 0.000002 | 0.000000 | 0.492490 | 0.981278 | 0.000639 | 0.100514 | 0.207014 | 0.649640 | 0.862840 | 0.118688 | 0.261753 |
| 2                                                                                                                               | 5B 1µM + LPS                                                  | 0.000000 |          | 0.022867 | 0.271682 | 0.000000 | 0.000000 | 0.000776 | 0.000000 | 0.000000 | 0.000000 | 0.000000 | 0.000000 | 0.000000 | 0.000000 | 0.000000 | 0.000000 |
| 3                                                                                                                               | 5B 10µM + LPS                                                 | 0.000000 | 0.022867 |          | 0.221294 | 0.000000 | 0.000000 | 0.000000 | 0.000000 | 0.000000 | 0.000000 | 0.000000 | 0.000000 | 0.000000 | 0.000000 | 0.000000 | 0.000000 |
| 4                                                                                                                               | 5B 20µM + LPS                                                 | 0.000000 | 0.271682 | 0.221294 |          | 0.000000 | 0.000000 | 0.000022 | 0.000000 | 0.000000 | 0.000000 | 0.000000 | 0.000000 | 0.000000 | 0.000000 | 0.000000 | 0.000000 |
| 5                                                                                                                               | 6B 1µM + LPS                                                  | 0.000008 | 0.000000 | 0.000000 | 0.000000 |          | 0.690689 | 0.000690 | 0.000084 | 0.000009 | 0.188108 | 0.001753 | 0.000538 | 0.000002 | 0.000005 | 0.001364 | 0.000345 |
| 6                                                                                                                               | 6B 10µM + LPS                                                 | 0.000002 | 0.000000 | 0.000000 | 0.000000 | 0.690689 |          | 0.002249 | 0.000022 | 0.000002 | 0.089063 | 0.000530 | 0.000154 | 0.000000 | 0.000001 | 0.000407 | 0.000097 |
| 7                                                                                                                               | 6B 20µM + LPS                                                 | 0.000000 | 0.000776 | 0.000000 | 0.000022 | 0.000690 | 0.002249 |          | 0.000000 | 0.000000 | 0.000009 | 0.000000 | 0.000000 | 0.000000 | 0.000000 | 0.000000 | 0.000000 |
| 8                                                                                                                               | 7B 1µM + LPS                                                  | 0.492490 | 0.000000 | 0.000000 | 0.000000 | 0.000084 | 0.000022 | 0.000000 |          | 0.507296 | 0.004740 | 0.330553 | 0.559660 | 0.256340 | 0.391158 | 0.374154 | 0.659055 |
| 9                                                                                                                               | 7B 10µM + LPS                                                 | 0.981278 | 0.000000 | 0.000000 | 0.000000 | 0.000009 | 0.000002 | 0.000000 | 0.507296 |          | 0.000686 | 0.105262 | 0.215374 | 0.632900 | 0.844442 | 0.124120 | 0.271662 |
| 10                                                                                                                              | 7B 20µM + LPS                                                 | 0.000639 | 0.000000 | 0.000000 | 0.000000 | 0.188108 | 0.089063 | 0.000009 | 0.004740 | 0.000686 |          | 0.053543 | 0.021606 | 0.000153 | 0.000374 | 0.044337 | 0.015184 |
| 11                                                                                                                              | 8B 1µM + LPS                                                  | 0.100514 | 0.000000 | 0.000000 | 0.000000 | 0.001753 | 0.000530 | 0.000000 | 0.330553 | 0.105262 | 0.053543 |          | 0.694210 | 0.038174 | 0.070724 | 0.931915 | 0.592385 |
| 12                                                                                                                              | 8B 10µM + LPS                                                 | 0.207014 | 0.000000 | 0.000000 | 0.000000 | 0.000538 | 0.000154 | 0.000000 | 0.559660 | 0.215374 | 0.021606 | 0.694210 |          | 0.088940 | 0.152791 | 0.758178 | 0.886522 |
| 13                                                                                                                              | 8B 20µM + LPS                                                 | 0.649640 | 0.000000 | 0.000000 | 0.000000 | 0.000002 | 0.000000 | 0.000000 | 0.256340 | 0.632900 | 0.000153 | 0.038174 | 0.088940 |          | 0.778059 | 0.046271 | 0.117780 |
| 14                                                                                                                              | flawanon 1µM + LPS                                            | 0.862840 | 0.000000 | 0.000000 | 0.000000 | 0.000005 | 0.000001 | 0.000000 | 0.391158 | 0.844442 | 0.000374 | 0.070724 | 0.152791 | 0.778059 |          | 0.084365 | 0.196661 |
| 15                                                                                                                              | flawanon 10µM + LPS                                           | 0.118688 | 0.000000 | 0.000000 | 0.000000 | 0.001364 | 0.000407 | 0.000000 | 0.374154 | 0.124120 | 0.044337 | 0.931915 | 0.758178 | 0.046271 | 0.084365 |          | 0.652516 |
| 16                                                                                                                              | flawanon 20µM + LPS                                           | 0.261753 | 0.000000 | 0.000000 | 0.000000 | 0.000345 | 0.000097 | 0.000000 | 0.659055 | 0.271662 | 0.015184 | 0.592385 | 0.886522 | 0.117780 | 0.196661 | 0.652516 |          |
